# Supplementary material for: Exploring the diverse definitions of ‘evidence’: a scoping review
Source: HighWire-hosted journal article supplement (doi:10.1136/bmjebm-2023-112355), 2023-11-08
Supplement: bmjebm-2023-112355supp001_data_supplement.pdf [file bmjebm-2023-112355supp001_data_supplement.pdf]

## Online Supplemental Material

### Search Strategies for five databases:

#### PubMed (n=2378)

- 1 "evidence"[Title]
- 2 "definition"[Title]
- 3 "concept"[Title]
- 4 "term"[Title]
- 5 "jargon"[Title]
- 6 "glossary"[Title]
- 7 OR/#2-6
- 8 #1 AND #7

#### WOS (n=4165)

- #1. "evidence"[Title]
- #2. "definition"[Title]
- #3. "concept"[Title]
- #4. "term"[Title]
- #5. "jargon"[Title]
- #6. "glossary"[Title]
- #7. OR/#2-6
- #8. #1 AND #7

#### EBSCO (n=1500)

- #1. "evidence"[Title]
- #2. "definition"[Title]
- #3. "concept"[Title]
- #4. "term"[Title]
- #5. "jargon"[Title]
- #6. "glossary"[Title]
- #7. OR/#2-6
- #8. #1 AND #7

#### CSDC (n=14)

- #1. "证据"[篇名]
- #2. "概念"[篇名]
- #3. "术语"[篇名]
- #4. "定义"[篇名]
- #5. OR/#2-4
- #6. #1 AND #5

#### CSSCI (n=50)

- #1. "证据"[题名]
- #2. "概念"[题名]
- #3. "术语"[题名]

- #4. "定义"[题名]
- #5. OR/#2-4
- #6. #1 AND #5

#### **Excluded documents after full-text review (n=19)**

##### ***There was no definition of evidence in the full text (n=11):***

1. Gugiu PC, Westine CD, Coryn CL, et al. An application of a new evidence grading system to research on the chronic care model. *Evaluation & the Health Professions*. 2013;36(1):3-43.
2. Atkins L, Smith JA, Kelly MP, et al. The process of developing evidence-based guidance in medicine and public health: a qualitative study of views from the inside. *Implementation science*. 2013;8:1-2.
3. Simonneaux L, Simonneaux J. Socio-scientific reasoning influenced by identities. *Cultural Studies of Science Education*. 2009;4(3):705-11.
4. Kirch SA. Teaching and learning the purpose of evidence for knowledge and knowing. *The Reading Teacher*. 2015 Sep;69(2):163-7.
5. 王学军,王子琦.从循证决策到循证治理:理论框架与方法论分析[J].图书与情报,2018(03):18-27.
6. 陈霜叶,孟浏今,张海燕.大数据时代的教育政策证据:以证据为本理念对中国教育治理现代化与决策科学化的启示[J].全球教育展望,2014,43(02):121-128.
7. 姚守志,王天芳.对证研究的回顾和展望(综述)[J].北京中医药大学学报,2001(02):10-13.
8. 沈彬,张鸣明,李幼平.循证医学与修复重建外科[J].中国修复重建外科杂志,2001(01):60-61.
9. 谢瑜.循证医学概念演进的哲学启示[J].科学技术哲学研究,2011,28(02):107-112.
10. 苏娜,张志强.面向学科战略规划的证据描述框架研究[J].图书情报工作,2010,54(18):11-15.
11. 伦志军,刘宏君,张永欣,伊丽春.因特网循证医学实践证据的检索流程[J].现代情报,2007(01):19-20.

##### ***Application field was not health or social science (n=8):***

12. Matsui T, Fitneva SA. Knowing how we know: Evidentiality and cognitive development. *New directions for child and adolescent development*. 2009;2009(125):1-1.
13. 尤洋.辩护与确证:证据问题研究[J].自然辩证法研究,2016,32(08):27-33.DOI:10.19484/j.cnki.1000-8934.2016.08.005.
14. 江怡,陈常桑.分析哲学中作为证据的事实[J].哲学分析,2017,8(03):3-9+196.
15. 舒卓,朱菁.证据与信念的伦理学[J].哲学研究,2014(04):106-112.
16. 舒卓,朱菁.证据是心理状态吗?[J].自然辩证法研究,2018,34(05):10-16.DOI:10.19484/j.cnki.1000-8934.2018.05.002.
17. 叶舒宪.物的叙事:中华文明探源的四重证据法[J].兰州大学学报(社会科学版),2010,38(06):1-8.DOI:10.13885/j.issn.1000-2804.2010.06.019.
18. 陈莹.如何理解证据主义[J].自然辩证法研究,2013,29(01):25-30.DOI:10.19484/j.cnki.1000-8934.2013.01.005.

19. 余伟.历史证据:近代以来西方世界的思考与脉络[J].学海,2012(06):158-164.DOI:10.16091/j.cnki.cn32-1308/c.2012.06.011.
